# Supplementary material for: Novel efficient green electroluminescent conjugated polymers based on fluorene and triarylpyrazoline for light-emitting diodes
Source: Royal Society of Chemistry journal article supplement (doi:10.1039/b313160b), 2004-01-01
Supplement: b313160b.doc [file b313160b.doc]

Supplementary Information

Title: Novel efficient green electroluminescent conjugated polymers based on fluorene and triaryl pyrazoline for light-emitting diodes (B313160B)

Qiang Peng,a Zhi-Yun Lu,a Yan Huang,a Ming-Gui Xie,*a Dan Xiao,b Shao-Hu Han,c Jun-Biao Pengc and Yong Caoc

aDepartment of Chemistry, Sichuan University, Chengdu 610064, China. Fax: +8602885413601; Tel: +8602885410059; E-mail: xiemingg@mail.sc.cninfo.net.

bDepartment of Chemical Engineering, Sichuan University, Chengdu 610065, China

cInstitute of Polymer Optoelectronic Materials and Devices, South China University of Technology, Guang Zhou, 510640, China

Synthesis and Characterization of Intermediate Compounds

1-(4-bromophenyl)-3-(4-bromophenyl)-2-propylene-1-one (2). To a mixture of 4-Bromoacetophenone (1.0 g, 5 mmol) in ethanol (10 mL), was added 0.78 mL aqueous NaOH (6.85 M), and then added 1 (0.93 g, 5 mmol). The mixture was stirred at room temperature for 3 h. The precipitate was filtered, washed with water and methanol. The crude product was recrystallized from ethanol to afford 2 as white powders. Yield: 85%. Mp: 176-177 ℃. 1HNMR (CDCl3, 400MHZ, δ/ppm): 7.90-7.87 (m, 2H), 7.77-7.73 (d, 1H), 7.67-7.64 (m, 2H), 7.58-7.45 (m, 5H). 13CNMR (CDCl3, 400MHZ, δ/ppm): 189.05, 143.91, 136.75, 133.63, 132.28, 132.11, 131.99, 131.70, 130.01, 129.84, 129.62, 128.09, 127.48, 125.06, 121.98. Anal. Calcd for C15H10OBr2: C, 49.22%; H, 2.75%. Found: C, 49.18%; H, 2.77%.

3,5-bis(4-bromophenyl)-4,5-dihydro-1-phenyl-1-H-pyrazole (3). A mixture of 2 (0.53 g, 1.45 mmol), phenylhydrazine (0.16 g, 1.45 mmol) in 2-ethoxyethanol (5 mL) was refluxed under argon for 2 h. Then the mixture was cooled to room temperature, and the precipitate was filtered. The crude product was recrystallized from ethanol to give monomer 3 as white powders. Yield: 87%. Mp: 125-126 ℃. 1HNMR (CDCl3, 400MHZ, δ/ppm): 7.80-7.76 (m, 2H), 7.58-7.52 (m, 4H), 7.47-7.30 (m, 4H), 7.16-7.12 (m, 2H), 6.80 (m, 1H), 5.52 (m, 1H), 3.78 (m, 1H), 3.01 (m, 1H). 13CNMR (CDCl3, 400MHZ, δ/ppm): 145.69, 144.42, 141.40, 132.41, 131.80, 13156, 129.15, 127.73, 127.25, 122.76, 121.59, 119.76, 113.61, 64.06, 43.20. Anal. Calcd for C21H16N2Br2: C, 55.29%; H, 3.54%; N, 6.14%. Found: C, 55.26%; H, 3.53%; N, 6.15%.

**2-hexyloxyl-5-bromobenzaldehyde (5a).** A mixture of **4** (7.9 g, 0.0393 mol), 1-bromohexane (6.5 g, 0.0393 mol), K2CO3 (16.4 g, 119 mol), and DMF (35 mL) was heated at 100 ℃ overnight under N2. The mixture was filtered, and DMF was removed under a reduced pressure. The crude product was purified by a silica gel column chromatography. Compound **5a** was obtained as light yellow oil with a yield of 90%. 1HNMR (CDCl3, 400MHZ, δ/ppm): 10.41 (s, 1H), 7.92 (d, 1H), 7.62-7.59 (m, 1H), 6.95-6.87 (d, 1H), 4.08-4.04 (t, 2H), 1.88-0.89 (m, 11H). 13CNMR (CDCl3, 400MHZ, δ/ppm): 188.27, 160.38, 138.13, 130.71, 114.57, 113.17, 68.99, 31.39, 28.89, 25.59, 22.46, 13.88. Anal. Calcd for C13H17O2Br: C, 54.75%; H, 6.01%. Found: C, 54.71%; H, 6.03%.

**2-dodecyloxyl-5-bromobenzaldehyde (5b).** Compound **5b** was obtained as white powders with a yield of 92% from the reaction of **4** with 1-bromododecane according to the procedure described for **5a**. Mp: 39.5-40.5 ℃. 1HNMR (CDCl3, 400MHZ, δ/ppm): 10.42 (s, 1H), 7.92 (d, 1H), 7.62-7.59 (m, 1H), 6.89-6.87 (d, 1H), 4.07-4.04 (t, 2H), 1.88-0.87 (m, 23H). 13CNMR (CDCl3, 400MHZ, δ/ppm): 187.74, 160.11, 137.88, 130.27, 125.81, 114.29, 112.88, 68.70, 31.72, 29.47, 29.45, 29.40, 29.36, 29.17, 29.14, 28.79, 25.79, 22.49, 13.91. Anal. Calcd for C19H29O2Br: C, 61.79%; H, 7.91%. Found: C, 61.72%; H, 7.93%.

**1-(4-bromophenyl)-3-(2-hexyloxyl-5-bromophenyl)-2-propylene-1-one (6a).** Compound **6a** was obtained as white powders with a yield of 83% from the reaction of **5a** with 4-Bromoacetophenone according to the procedure described for **2**. Mp: 114-115 ℃. 1HNMR (CDCl3, 400MHZ, δ/ppm): 8.02-7.87 (m, 3H), 7.71-7.57 (m, 4H), 7.46-7.43 (m, 1H), 6.83-6.81 (d, 1H), 4.05-4.02 (t, 2H), 1.90-0.88 (m, 11H). 13CNMR (CDCl3, 400MHZ, δ/ppm): 189.24, 157.30, 139.33, 136.88, 133.99, 131.75, 131.80, 129.90, 127.69, 125.63, 123.06, 113.77, 112.71, 68.84, 31.45, 29.04, 25.74, 22.47, 13.90. Anal. Calcd for C21H22O2Br2: C, 54.10%; H, 4.76%. Found: C, 54.06%; H, 4.78%.

**1-(4-bromophenyl)-3-(2-dodecyloxyl-5-bromophenyl)-2-propylene-1-one (6b).** Compound **6b** was obtained as white powders with a yield of 86% from the reaction of **5b** with 4-Bromoacetophenone according to the procedure described above. Mp: 76-77 ℃. 1HNMR (CDCl3, 400MHZ, δ/ppm): 7.99-7.81 (m, 3H), 7.70-7.57 (m, 4H), 7.44-7.41 (m, 1H), 6.82-6.80 (d, 1H), 4.04-4.01 (t, 2H), 1.89-0.85 (m, 23H). 13CNMR (CDCl3, 400MHZ, δ/ppm): 189.24, 157.36, 139.42, 136.92, 134.02, 131.90, 131.79, 129.94, 129.59, 127.74, 125.69, 123.11, 113.80, 112.76, 68.89, 31.85, 29.60, 29.57, 29.52, 29.37, 29.28, 29.14, 26.13, 22.62, 14.05. Anal. Calcd for C27H34O2Br2: C, 83.37%; H, 6.23%. Found: C, 83.31%; H, 6.25%.

**3-(4-bromophenyl)-5-(2-hexyloxyl-5-bromophenyl)-4,5-dihydro-1-phenyl-1-H-pyrazole (7a).** Compound 7a was obtained as white powders in 80% yield from the reaction of 6a with phenylhydrazine according to the procedure described for 3. mp: 132-133 ℃. 1HNMR (CDCl3, 400MHZ, δ/ppm): 7.59-7.43 (m, 4H), 7.36-7.19 (m, 4H), 7.03-7.02 (m, 2H), 6.84-6.68 (m, 2H), 5.55-5.50 (m, 1H), 4.06-4.03 (t, 2H), 3.85-3.78 (m, 1H), 3.00-2.94 (m, 1H), 1.87-0.81 (m, 23H). 13CNMR (CDCl3, 400MHZ, δ/ppm): 146.23, 144.61, 133.63, 133.05, 132.26, 131.77, 131.72, 131.63, 131.33, 129.43, 128.97, 128.63, 127.31, 127.14, 123.24, 122.49, 119.40, 113.25, 68.45, 58.90, 41.89, 31.49, 31.35, 29.19, 28.52, 25.85, 22.60, 14.00. Anal. Calcd for C27H28N2OBr2: C, 58.29%; H, 5.07%; N, 5.04%. Found: C, 58.24%; H, 5.09%; N, 5.07%.

3-(4-bromophenyl)-5-(2-dodecyloxyl-5-bromophenyl)-4,5-dihydro-1-phenyl-1-H-pyrazole (7b). Compound 7b was obtained as white powders in 82% yield from the reaction of 6a with phenylhydrazine according to the procedure described above. mp: 95-96 ℃. 1HNMR (CDCl3, 400MHZ, δ/ppm): 7.58-7.49 (m, 4H), 7.33-7.19 (m, 4H), 7.04-7.01 (m, 2H), 6.84-6.79 (m, 2H), 5.51 (m, 1H), 4.04 (t, 2H), 3.81 (m, 1H), 3.00 (m, 1H), 1.85-0.85 (m, 23H). 13CNMR (CDCl3, 400MHZ, δ/ppm): 146.21, 144.62, 132.27, 131.78, 131.63, 131.32, 129.44, 128.97, 127.14, 122.49, 119.40, 113.26, 68.45, 58.93, 41.89, 31.89, 29.68, 29.63, 29.34, 29.23, 26.21, 22.67, 14.09. Anal. Calcd for C33H40N2OBr2: C, 61.88%; H, 6.29%; N, 4.37%. Found: C, 61.84%; H, 6.30%; N, 4.38%.
